# Supplementary material
Source: PubMed Central journal article supplement (PMC10642651)
Supplement: NIHPP2023.05.12.23289915v3-supplement-1.pdf [file NIHPP2023.05.12.23289915v3-supplement-1.pdf]

## Supporting Information

**Table S1. Overall syringe sharing reduction and regret scores under for each reasonable access assumption under each scenario.**

| Overall Needle Sharing Reduction (Enrollment 90% compared to Enrollment 0%) & Regret Scores |         |                    |        |                          |      |        |        |        |            |              |       |       |       |  |
|---------------------------------------------------------------------------------------------|---------|--------------------|--------|--------------------------|------|--------|--------|--------|------------|--------------|-------|-------|-------|--|
| Threshold                                                                                   | Penalty | Max dist threshold |        | Needle sharing reduction |      |        |        |        | Best (max) | Regret score |       |       |       |  |
|                                                                                             |         |                    |        | Actual                   | S1   | S2     | S3     |        |            | RS_Actual    | RS_S1 | RS_S2 | RS_S3 |  |
| 1/5                                                                                         | 0.6     | F                  | 870K   | 870K                     | 429K | 943K   | 1,013K | 1,013K | 143K       | 584K         | 70K   | 0K    | 0K    |  |
| 1/5                                                                                         | 0.6     | T                  | 870K   | 870K                     | 429K | 943K   | 1,016K | 1,016K | 146K       | 587K         | 73K   | 0K    | 0K    |  |
| 1/5                                                                                         | 0.75    | F                  | 895K   | 895K                     | 486K | 972K   | 1,043K | 1,043K | 148K       | 557K         | 71K   | 0K    | 0K    |  |
| 1/5                                                                                         | 0.75    | T                  | 902K   | 902K                     | 486K | 972K   | 1,034K | 1,034K | 132K       | 548K         | 62K   | 0K    | 0K    |  |
| 1/5                                                                                         | 0.9     | F                  | 985K   | 985K                     | 656K | 1,036K | 1,097K | 1,097K | 112K       | 441K         | 61K   | 0K    | 0K    |  |
| 1/5                                                                                         | 0.9     | T                  | 980K   | 980K                     | 656K | 1,036K | 1,087K | 1,087K | 107K       | 431K         | 51K   | 0K    | 0K    |  |
| 2/10                                                                                        | 0.6     | F                  | 1,014K | 1,014K                   | 713K | 1,108K | 1,050K | 1,050K | 94K        | 395K         | 0K    | 58K   | 58K   |  |
| 2/10                                                                                        | 0.6     | T                  | 1,007K | 1,007K                   | 713K | 1,108K | 1,062K | 1,062K | 1,088K     | 101K         | 395K  | 0K    | 46K   |  |
| 2/10                                                                                        | 0.75    | F                  | 1,016K | 1,016K                   | 734K | 1,120K | 1,063K | 1,120K | 103K       | 385K         | 0K    | 57K   | 57K   |  |
| 2/10                                                                                        | 0.75    | T                  | 1,020K | 1,020K                   | 734K | 1,120K | 1,063K | 1,120K | 100K       | 385K         | 0K    | 56K   | 56K   |  |
| 2/10                                                                                        | 0.9     | F                  | 1,050K | 1,050K                   | 823K | 1,117K | 1,078K | 1,117K | 66K        | 294K         | 0K    | 39K   | 39K   |  |
| 2/10                                                                                        | 0.9     | T                  | 1,045K | 1,045K                   | 823K | 1,117K | 1,076K | 1,117K | 72K        | 294K         | 0K    | 41K   | 41K   |  |
| 5/20                                                                                        | 0.6     | F                  | 1,059K | 1,059K                   | 807K | 1,073K | 1,042K | 1,042K | 14K        | 266K         | 0K    | 30K   | 30K   |  |
| 5/20                                                                                        | 0.6     | T                  | 1,061K | 1,061K                   | 807K | 1,073K | 1,044K | 1,073K | 11K        | 266K         | 0K    | 29K   | 29K   |  |
| 5/20                                                                                        | 0.75    | F                  | 1,062K | 1,062K                   | 826K | 1,079K | 1,052K | 1,079K | 17K        | 254K         | 0K    | 27K   | 27K   |  |
| 5/20                                                                                        | 0.75    | T                  | 1,071K | 1,071K                   | 826K | 1,079K | 1,047K | 1,079K | 8K         | 254K         | 0K    | 32K   | 32K   |  |
| 5/20                                                                                        | 0.9     | F                  | 1,065K | 1,065K                   | 896K | 1,083K | 1,060K | 1,083K | 18K        | 187K         | 0K    | 23K   | 23K   |  |
| 5/20                                                                                        | 0.9     | T                  | 1,072K | 1,072K                   | 896K | 1,083K | 1,053K | 1,083K | 10K        | 187K         | 0K    | 30K   | 30K   |  |
| 75th percentile RS                                                                          |         |                    |        |                          |      |        |        |        | 111K       | 439K         | 58K   | 40K   |       |  |

Table S1 shows the syringe sharing reduction outcome for each reasonable access assumption under each scenario, along with regret scores. For example, when the ideal geographical travel distance preference is set to be low (i.e., 1 mile for urban and 5 miles for suburban), penalty equals to 0.6, and we do not set a maximum limit, Scenario 3 (Need-based 2) generates the most syringe sharing reduction (1,013K, see first row in Table S1). Accordingly, the regret score for each other scenario is the difference between their syringe sharing reduction result and Scenario 3 (Need-based 2). In this case, Scenario 1 (spatially random) generates the largest regret score, meaning we expect the syringe sharing reduction to be the lowest in this case. In the last row of Table S1, we report the 75th percentile of regret scores across each of the 18 reasonable access assumptions for each scenario, from which we observe that the two *Need-based* scenarios (Scenario 2 and Scenario 3) perform the best. Notably, the *Actual* scenario performs worse than the two *Need-based* scenarios but better than the *Random* scenario.

**Table S2. Overall syringe sharing reduction relative risk and regret scores for each reasonable access assumption under each scenario.**

| Overall Needle Sharing Reduction Relative Risk (Enrollment 90%/Enrollment 0%, zip code weighted by Enrollment 0%) |           |         |           |        |       |       |       |                    |           |       |       |       |       |
|-------------------------------------------------------------------------------------------------------------------|-----------|---------|-----------|--------|-------|-------|-------|--------------------|-----------|-------|-------|-------|-------|
| exp                                                                                                               |           | Penalty | Threshold | Actual | S1    | S2    | S3    | Best (min)         | RS_Actual | RS_S1 | RS_S2 | RS_S3 |       |
| 1                                                                                                                 |           | 0.6     | 1/5       | 0.567  | 0.786 | 0.530 | 0.495 | 0.495              | 0.071     | 0.291 | 0.035 | 0.000 |       |
| 2                                                                                                                 |           | 0.6     | 2/10      | 0.495  | 0.645 | 0.448 | 0.477 | 0.448              | 0.047     | 0.197 | 0.000 | 0.029 |       |
| 3                                                                                                                 |           | 0.6     | 5/20      | 0.472  | 0.598 | 0.466 | 0.481 | 0.466              | 0.007     | 0.132 | 0.000 | 0.015 |       |
| 4                                                                                                                 | No Max    | 0.75    | 1/5       | 0.554  | 0.758 | 0.516 | 0.480 | 0.480              | 0.074     | 0.278 | 0.035 | 0.000 |       |
| 5                                                                                                                 | Distance  | 0.75    | 2/10      | 0.494  | 0.634 | 0.442 | 0.470 | 0.442              | 0.052     | 0.192 | 0.000 | 0.028 |       |
| 6                                                                                                                 | Threshold | 0.75    | 5/20      | 0.471  | 0.589 | 0.462 | 0.476 | 0.462              | 0.009     | 0.126 | 0.000 | 0.014 |       |
| 7                                                                                                                 |           | 0.9     | 1/5       | 0.509  | 0.673 | 0.484 | 0.453 | 0.453              | 0.056     | 0.220 | 0.030 | 0.000 |       |
| 8                                                                                                                 |           | 0.9     | 2/10      | 0.477  | 0.590 | 0.444 | 0.463 | 0.444              | 0.033     | 0.146 | 0.000 | 0.019 |       |
| 9                                                                                                                 |           | 0.9     | 5/20      | 0.469  | 0.554 | 0.461 | 0.472 | 0.461              | 0.009     | 0.093 | 0.000 | 0.011 |       |
| 10                                                                                                                |           | 0.6     | 1/5       | 0.567  | 0.786 | 0.530 | 0.494 | 0.494              | 0.073     | 0.293 | 0.036 | 0.000 |       |
| 11                                                                                                                |           | 0.6     | 2/10      | 0.498  | 0.645 | 0.448 | 0.471 | 0.448              | 0.050     | 0.197 | 0.000 | 0.023 |       |
| 12                                                                                                                |           | 0.6     | 5/20      | 0.471  | 0.598 | 0.466 | 0.480 | 0.466              | 0.006     | 0.132 | 0.000 | 0.014 |       |
| 13                                                                                                                | Max 15/60 | 0.75    | 1/5       | 0.550  | 0.758 | 0.516 | 0.485 | 0.485              | 0.066     | 0.273 | 0.031 | 0.000 |       |
| 14                                                                                                                | miles     | 0.75    | 2/10      | 0.492  | 0.634 | 0.442 | 0.470 | 0.442              | 0.050     | 0.192 | 0.000 | 0.028 |       |
| 15                                                                                                                | Distance  | 0.75    | 5/20      | 0.466  | 0.589 | 0.462 | 0.478 | 0.462              | 0.004     | 0.126 | 0.000 | 0.016 |       |
| 16                                                                                                                | Threshold | 0.9     | 1/5       | 0.512  | 0.673 | 0.484 | 0.459 | 0.459              | 0.053     | 0.215 | 0.025 | 0.000 |       |
| 17                                                                                                                |           | 0.9     | 2/10      | 0.479  | 0.590 | 0.444 | 0.464 | 0.444              | 0.036     | 0.146 | 0.000 | 0.020 |       |
| 18                                                                                                                |           | 0.9     | 5/20      | 0.466  | 0.554 | 0.461 | 0.475 | 0.461              | 0.005     | 0.093 | 0.000 | 0.015 |       |
|                                                                                                                   |           |         |           |        |       |       |       | 75th percentile RS | 0.055     | 0.219 | 0.029 | 0.020 | 0.020 |

Note. RS represents regret score.
